# Supplementary material for: Fast and easy conversion of ortho amidoaryldiselenides into the corresponding ebselen-like derivatives driven by theoretical investigations
Source: Royal Society of Chemistry journal article supplement (doi:10.1039/d0nj01605e), 2020-01-01
Supplement: d0nj01605e1.pdf [file d0nj01605e1.pdf]

**Fast and easy conversion of *ortho* amidoaryldiselenides into  
the corresponding Ebselen-like derivatives driven by  
theoretical investigations.**

Vanessa Nascimento<sup>a</sup>, Pâmella Silva Cordeiro<sup>a</sup>, Massimiliano Arca<sup>b</sup>, Francesca Marini,<sup>c</sup> Luca Sancineto<sup>c</sup>, Antonio Luiz Braga<sup>d</sup>, Vito Lippolis<sup>b</sup>, Michio Iwaoka<sup>e</sup> and Claudio Santi<sup>c</sup>

*Supporting Information*

|                                                        |          |
|--------------------------------------------------------|----------|
| <i>Copies of the spectra of unknown compounds</i>      | <b>2</b> |
| <i>GPx-mimic activity evaluation of compounds 9a-k</i> | <b>7</b> |
| <i>References</i>                                      | <b>8</b> |

*<sup>1</sup>H <sup>13</sup>C and mass spectra of the new compounds*

*2-(1-phenylpropan-2-yl)benzo[d][1,2]selenazol-3(2H)-one (9b)*

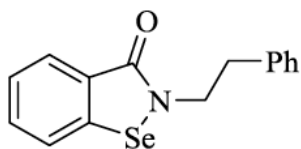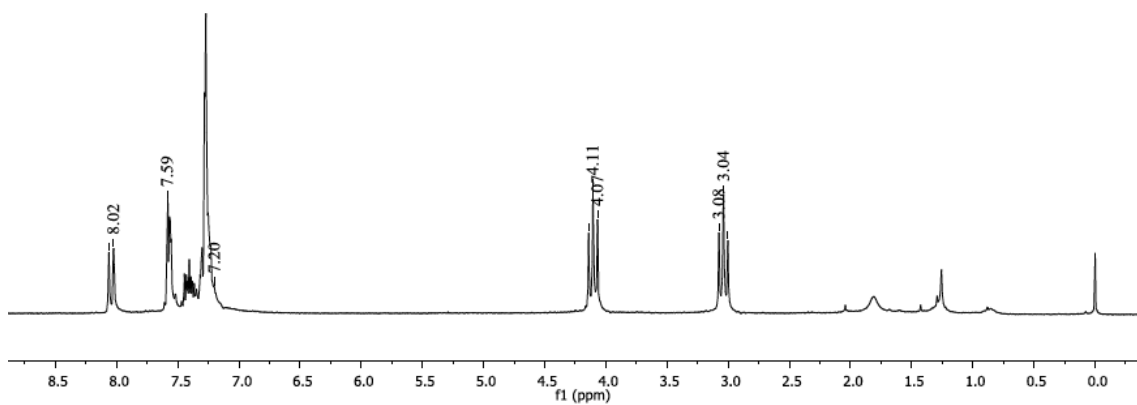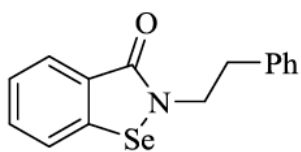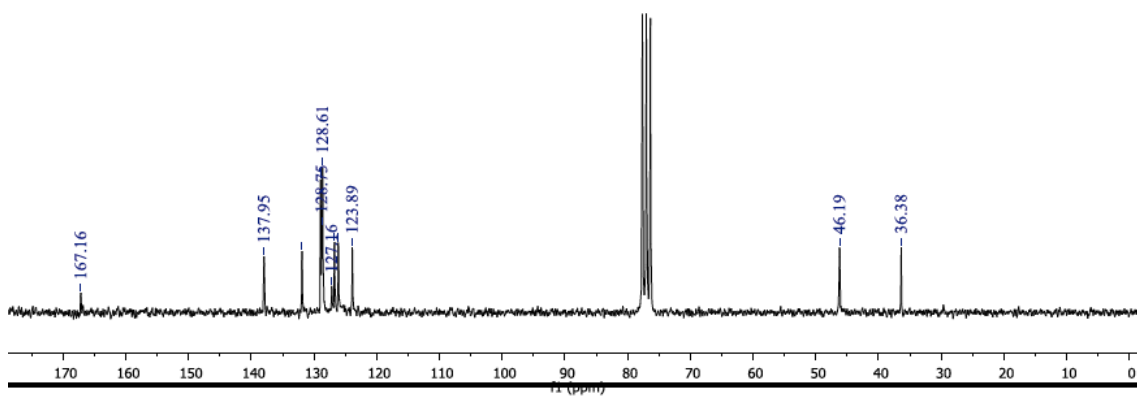

(S)-ethyl 3-methyl-2-(3-oxobenzod[1,2]selenazol-2(3H)-yl)butanoate (**9e**)

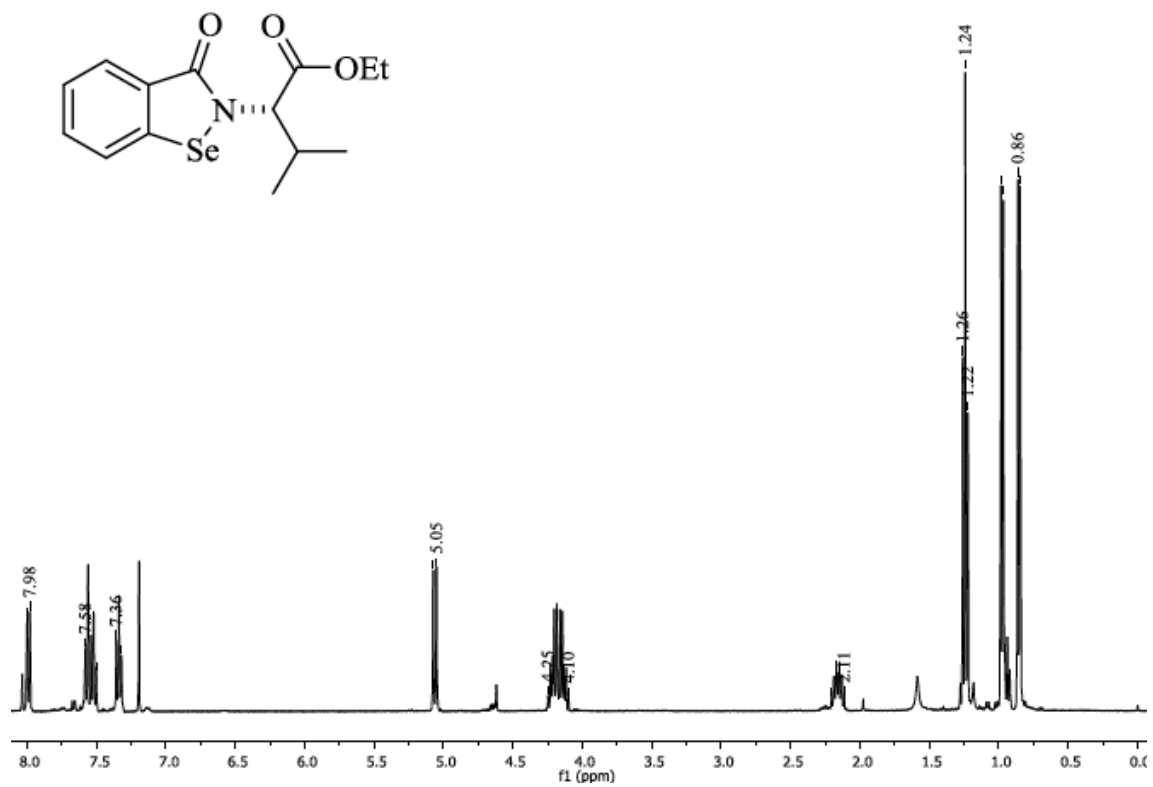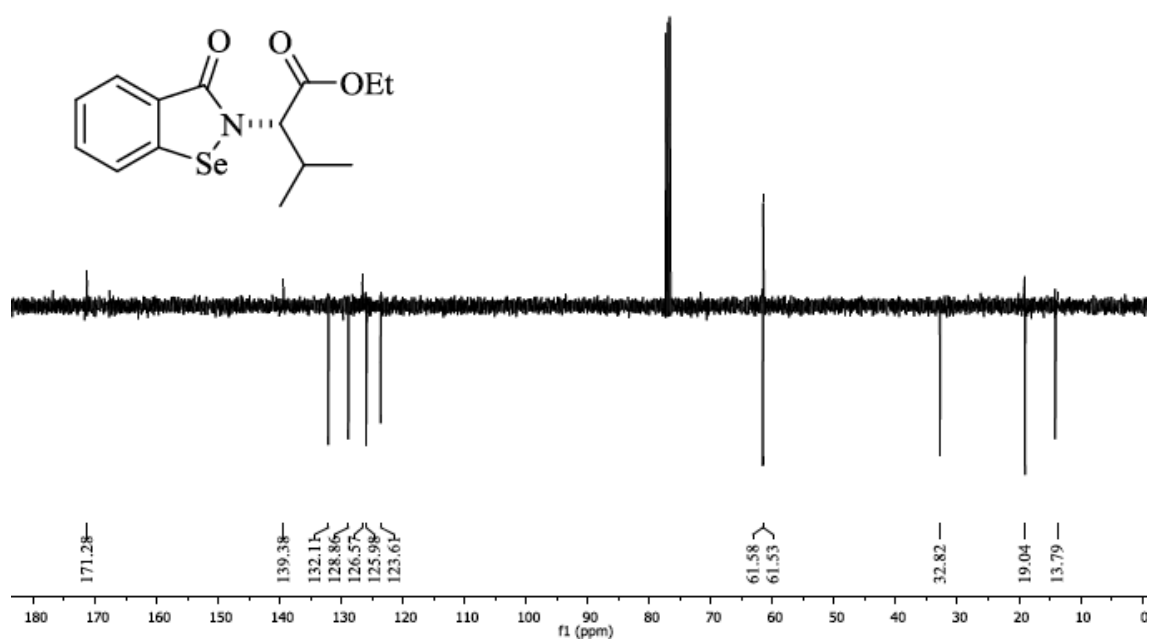

(S)-dimethyl 2-(3-oxobenzo[d][1,2]selenazol-2(3H)-yl)succinate (**9g**)

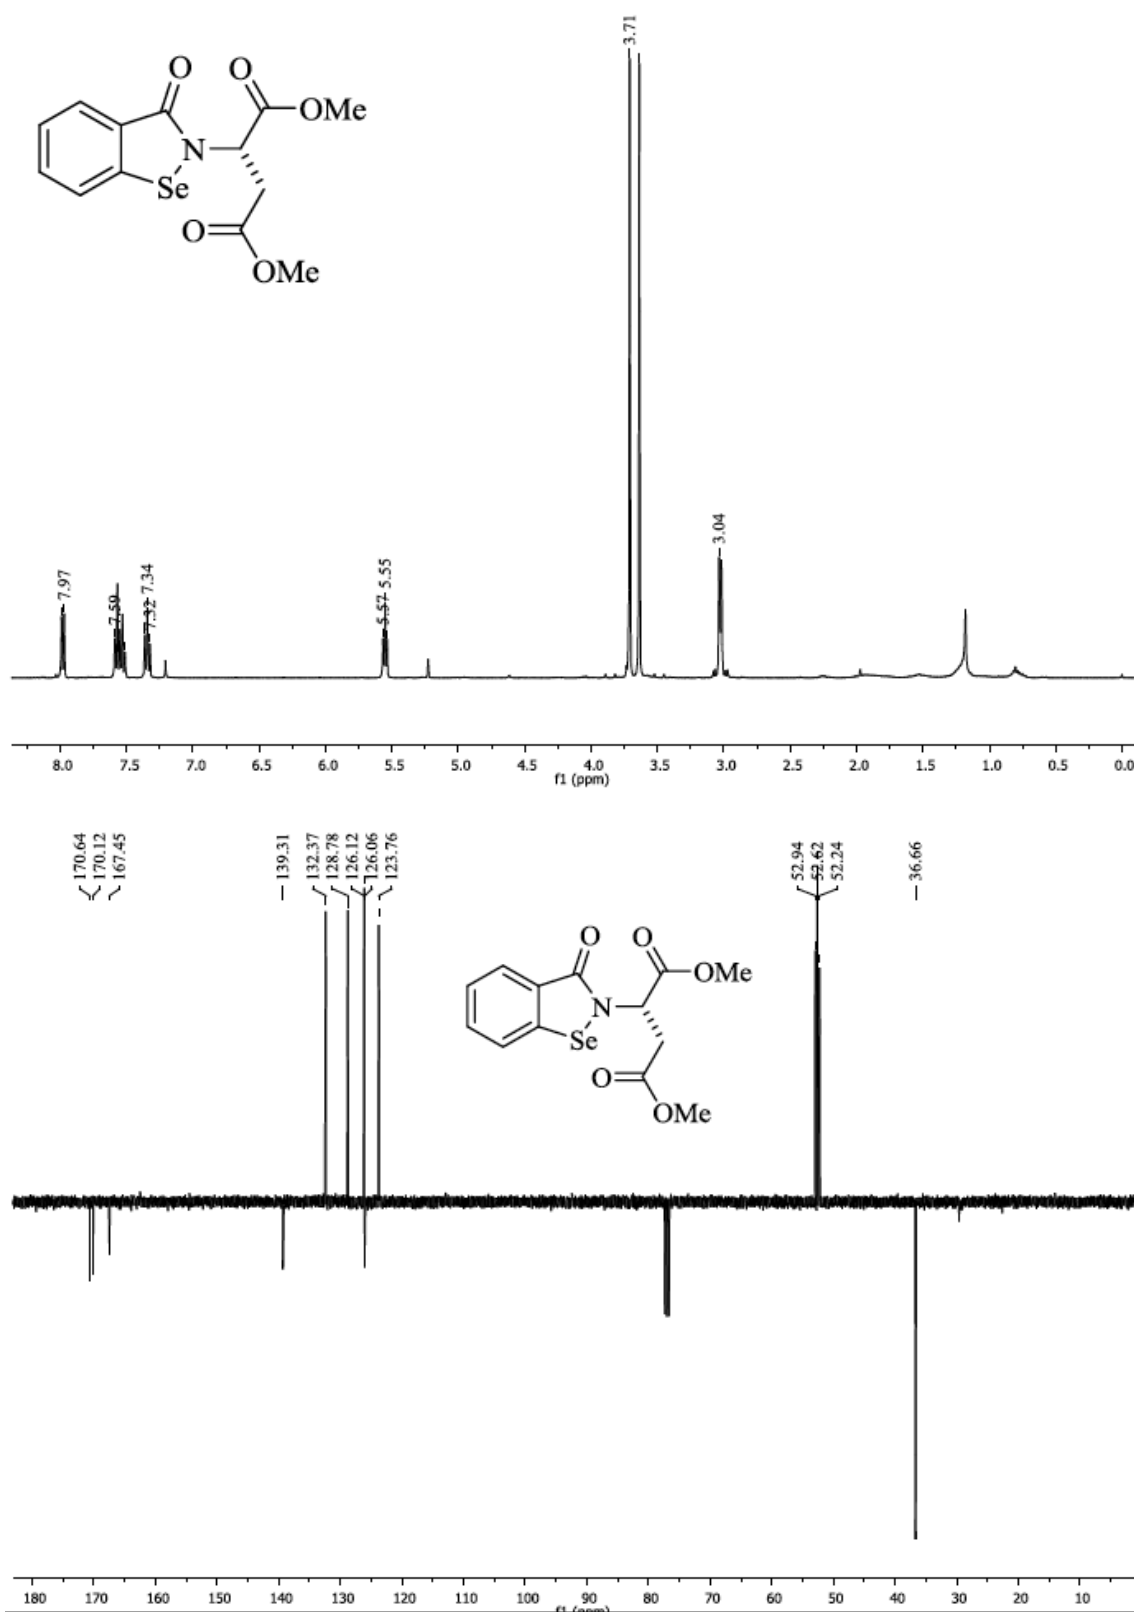

(*S*)-diethyl 2-(3-oxobenzo[*d*][1,2]selenazol-2(3*H*)-yl)pentanedioate (**9h**)

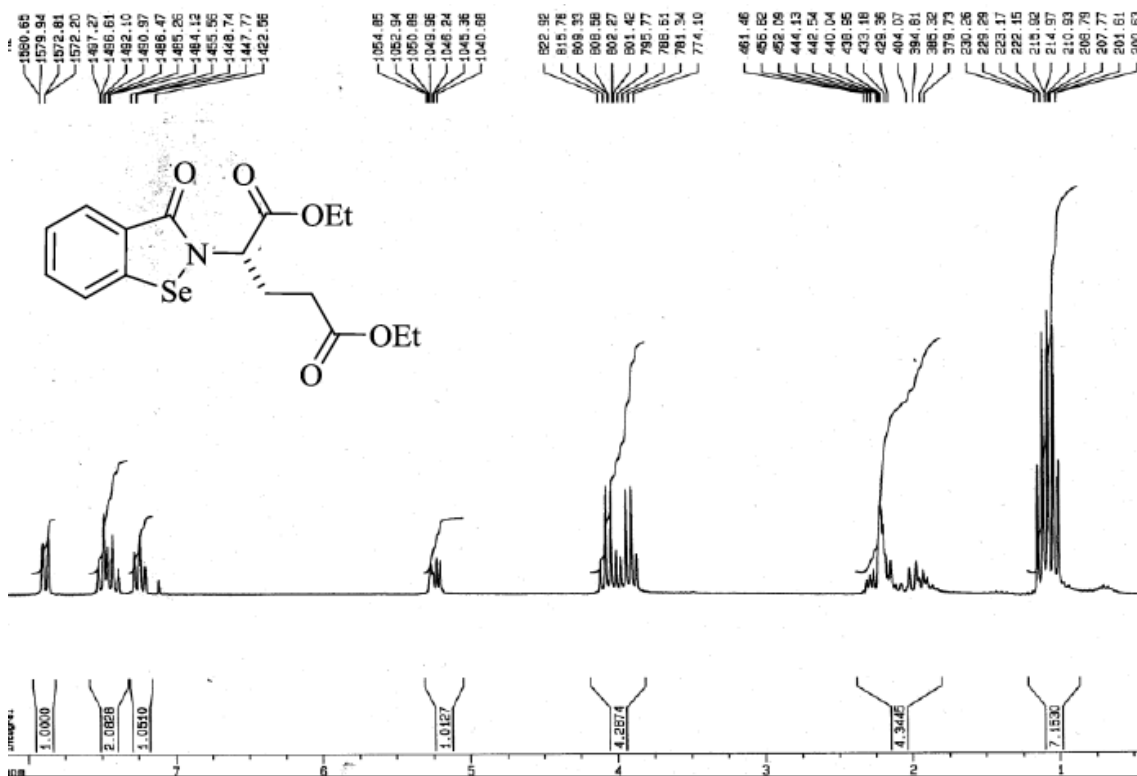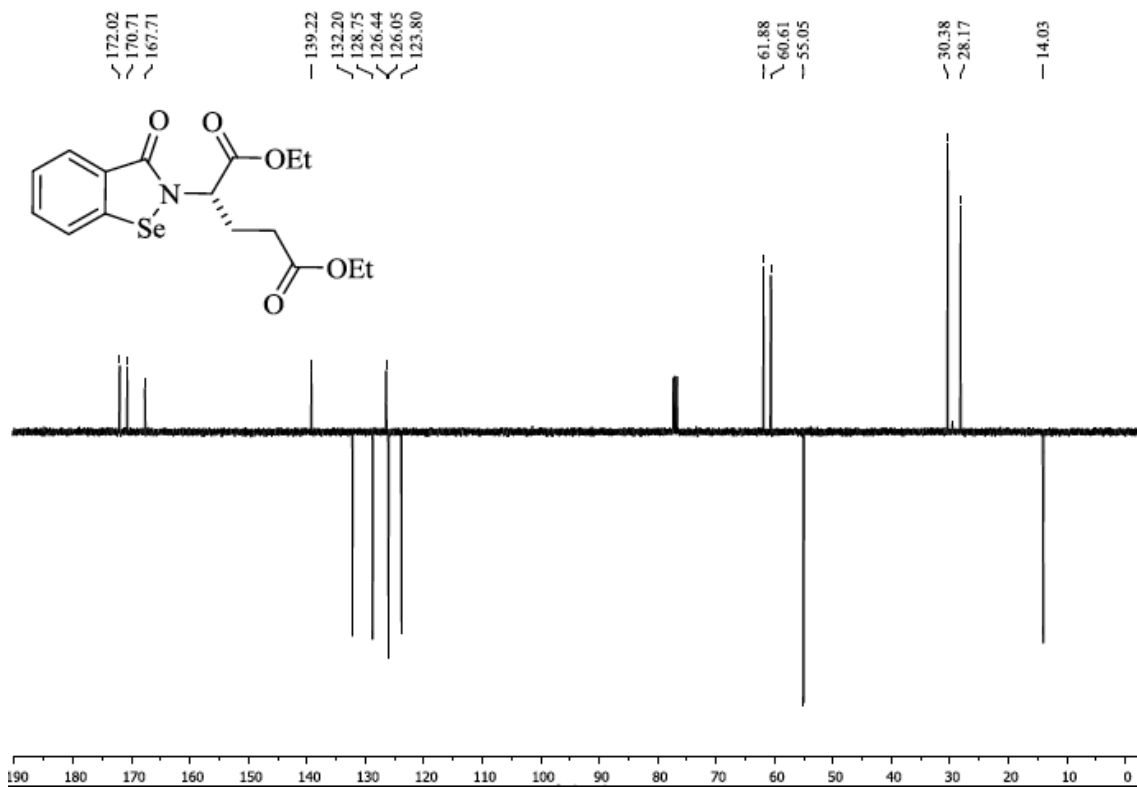

2-(1-phenylpropan-2-yl)benzo[d]isothiazol-3(2H)-one (91)

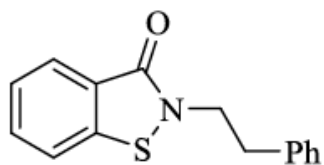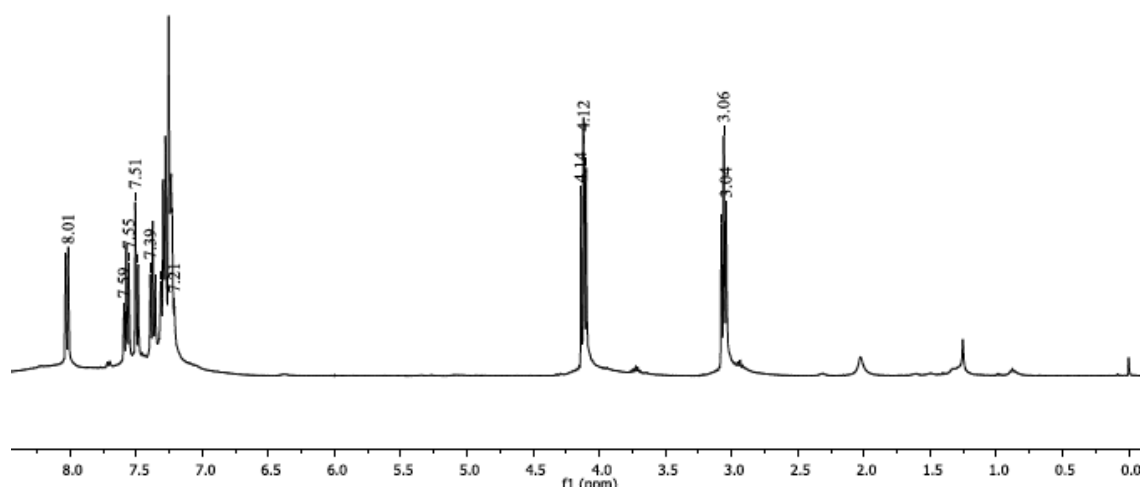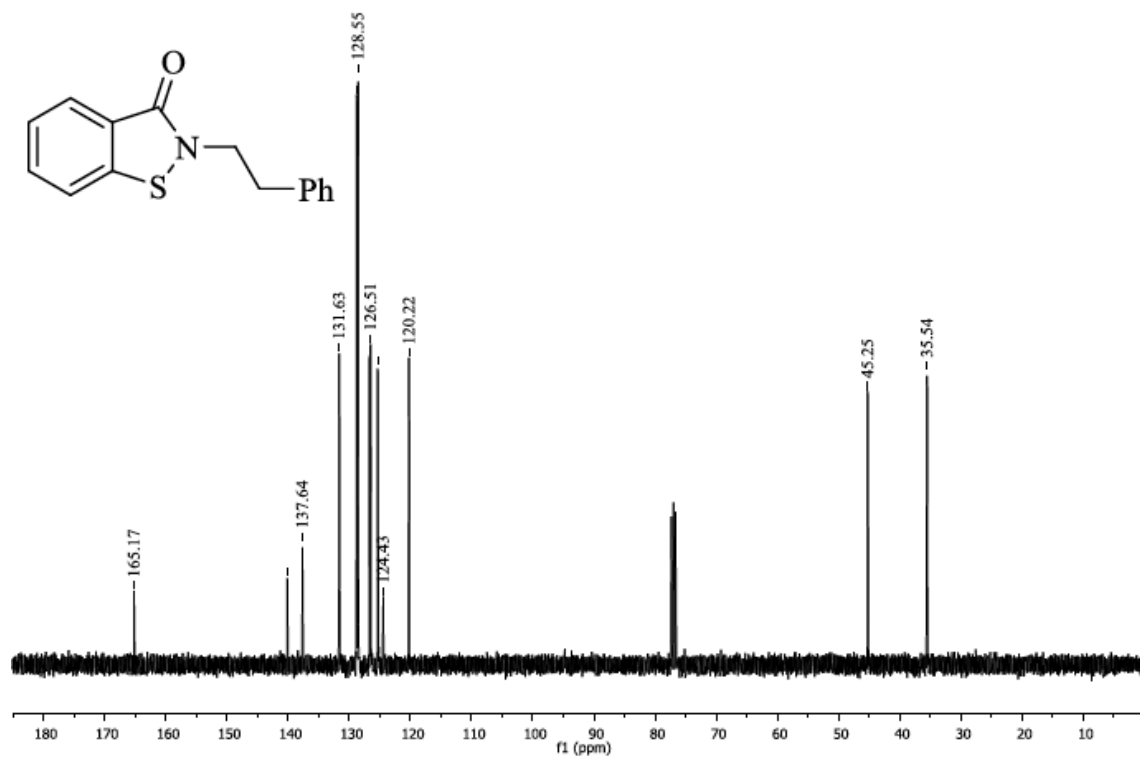

### Glutathione-peroxidase-like activity assay

The experiments to measure the catalytic activity of the ebselen and its derivatives as mimetics of the GPx enzyme were carried out according to the Tomoda method [9–11]. In a quartz cuvette, the selenium catalyst (final concentration = 0,01mM), thiophenol (final concentration = 5 mM) and MeOH at 25(± 3) °C were mixed.

| Entry | R                                                                                   | Ch | Product | Vel rel to 9k |
|-------|-------------------------------------------------------------------------------------|----|---------|---------------|
| 1     | 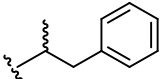   | Se | 9a      | 0.97          |
| 2     |    | Se | 9b      | 0.83          |
| 3     |    | Se | 9c      | 0.82          |
| 4     |   | Se | 9d      | 1.11          |
| 5     |  | Se | 9e      | 1.10          |
| 6     |  | Se | 9f      | 1.07          |
| 7     |  | Se | 9g      | 0.96          |
| 8     |  | Se | 9h      | 0.87          |
| 9     |  | Se | 9i      | 1.08          |
| 10    |  | Se | 9j      | 0.82          |
| 11    |  | Se | 9k      | 1.0           |

The spectrophotometer was programmed to promote the reading of UV light absorbance at a wavelength of 305 nm every 10 seconds due the formation of the PhSSPh. After around 120 seconds of the beginning of the experiment, the catalytic GPx model reaction ( $\text{H}_2\text{O}_2 + 2\text{PhSH} \rightarrow 2\text{H}_2\text{O} + \text{PhSSPh}$ ) was initiated by the addition of  $\text{H}_2\text{O}_2$  (final concentration: 10mM). The reaction was monitored for more 150 seconds. Each analysis was done in triplicate.

### ***Comparison of the catalytic activity (GPx-like) of 8k and 9k***

The experimental procedure used was analogous to the previous one with the same concentration of thiophenol (final concentration = 5 mM) and  $\text{H}_2\text{O}_2$  (final concentration: 10mM). However, the volume of methanol used was 0.66 ml and the experiment was started after 100 seconds. Furthermore, the reaction was monitored for more 200 seconds. The selenium catalysts used were ebselen and ebselen diselenide, where the concentrations were varied according to the tests below.

| Selenium catalyst | Test 1 (final concentration [mM]) | Test 2 (final concentration [mM]) | Test 3 (final concentration [mM]) | Test 4 (final concentration [mM]) |
|-------------------|-----------------------------------|-----------------------------------|-----------------------------------|-----------------------------------|
| <b>9k</b>         | 0.020                             | 0.010                             | 0.100                             | 0.050                             |
| <b>8k</b>         | 0.010                             | 0.005                             | 0.050                             | 0.025                             |

### ***Calculation of T50***

The stoichiometric ratio between PhSSPh and PhSH is 1:2, respectively. The rate of PhSSPh formation is known from the linear portion of peroxidase-like activity spectrophotometric quantification. Thus, from the total concentration of PhSH and the rate of PhSSPh formation, the calculation was performed by a extrapolation the time required to consume 50% of PhSH, that is, the T50.

### ***References***

1. Węglarz-Tomczak, E.; Burda-Grabowska, M.; Giurg, M.; Mucha, A. Identification of methionine aminopeptidase 2 as a molecular target of the organoselenium drug ebselen and its derivatives/analogues: Synthesis, inhibitory activity and molecular modeling study. *Bioorg. Med. Chem. Lett.* **2016**, *26*, 5254–5259.
2. Krasowska, D.; Iraci, N.; Santi, C.; Drabowicz, J.; Cieslak, M.; Kaźmierczak-Barańska, J.; Palomba, M.; Królewska-Golińska, K.; Magiera, J.; Sancineto, L. Diselenides and Benzeneselenazolones as Antiproliferative Agents and Glutathione-S-Transferase Inhibitors. *Molecules* **2019**, *24*, 2914.
3. Mlochowski, J.; Juchniewicz, L.; Kloc, K.; Gryglewski, R. J.; Jakubowski, A.; Ingłot, A. D. Synthesis and Properties of 2-Carboxyalkyl-1,2-benzisoselenazol-3(2H)-ones and Related Organoselenium Compounds as Nitric Oxide Synthase Inhibitors and Cytokine Inducers. *Liebig's Ann.* **1996**, *1996*, 1751–1755.



4. Macegoniuk, K.; Grela, E.; Palus, J.; Rudzińska-Szostak, E.; Grabowiecka, A.; Biernat, M.; Berlicki, Ł. 1,2-Benzisoselenazol-3(2 H )-one Derivatives As a New Class of Bacterial Urease Inhibitors. *J. Med. Chem.* **2016**, *59*, 8125–8133.
5. Bhabak, K. P.; Mugesh, G. Amide-Based Glutathione Peroxidase Mimics: Effect of Secondary and Tertiary Amide Substituents on Antioxidant Activity. *Chem. - An Asian J.* **2009**, *4*, 974–983.
6. Lesser, R.; Weiss, R. Über selenhaltige aromatische Verbindungen (VI). *Chem. Ber.* **1924**, 1077–1082.
7. Piętka-Ottlik, M.; Wójtowicz-Młochowska, H.; Kołodziejczyk, K.; Piasecki, E.; Młochowski, J. New Organoselenium Compounds Active against Pathogenic Bacteria, Fungi and Viruses. *Chem. Pharm. Bull. (Tokyo)*. **2008**, *56*, 1423–1427.
8. Sano, T.; Takagi, T.; Gama, Y.; Shibuya, I.; Shimizu, M. A Practical Synthesis of N-Substituted 1,2-Benzisothiazolin-3-ones from N,N'-Disubstituted 2,2'-Dithiodibenzamides. *Synthesis (Stuttg)*. **2004**, *2004*, 1585–1588.
9. Iwaoka, M.; Tomoda, S. A Model Study on the Effect of an Amino Group on the Antioxidant Activity of Glutathione Peroxidase. *J. Am. Chem. Soc.* **1994**, *116*, 2557–2561.
10. Nascimento, V.; Alberto, E. E.; Tondo, D. W.; Dambrowski, D.; Detty, M. R.; Nome, F.; Braga, A. L. GPx-Like Activity of Selenides and Selenoxides: Experimental Evidence for the Involvement of Hydroxy Perhydroxy Selenane as the Active Species. *J. Am. Chem. Soc.* **2012**, *134*, 138–141.
11. Nascimento, V.; Ferreira, N. L.; Canto, R. F. S.; Schott, K. L.; Waczuk, E. P.; Sancineto, L.; Santi, C.; Rocha, J. B. T.; Braga, A. L. Synthesis and biological evaluation of new nitrogen-containing diselenides. *Eur. J. Med. Chem.* **2014**, *87*, 131–139.
